Title: ACCURACY OF PULSE OXIMETRY IN CYANOTIC CONGENITAL HEART DISEASE

Authors: V.A. Lazzell, M.D. and M.W. Jopling, M.D.

Affiliation: Department of Anesthesiology, West Virginia University  
School of Medicine, Morgantown, West Virginia 26506

# INTRODUCTION:

Children with cyanotic congenital heart disease (CCHD) during their perioperative course can undergo rapid changes in their physical status. Measurement of oxygen saturation (SaO<sub>2</sub>) is an invaluable monitor to detect hypoxemia, as well as to optimize pulmonary and systemic blood flows during anesthesia and in the ICU (1). While several investigators have evaluated oximetry in the 90 % SaO<sub>2</sub> range (1,2,3), we have investigated the accuracy of SaO<sub>2</sub> values less than 85 % as derived from pulse oximetry.

# METHODS:

Nine children, ages 4 days - 18 months with various CCHD defects were studied. This study was approved by the Institutional Review Board. Simultaneous routine measurements of SaO<sub>2</sub> by pulse oximetry and arterial blood gas co-oximetry in the same extremity were obtained perioperatively. Blood drawn from an indwelling arterial line was evaluated for pH, pO<sub>2</sub>, pCO<sub>2</sub>, HCO<sub>3</sub>, SaO<sub>2</sub> and hemoglobin content. The co-oximeter, an Instrumentation Laboratories IL282, measured the arterial blood SaO<sub>2</sub> (% O<sub>2</sub> Hgb). Continuous SaO<sub>2</sub> was monitored using the Nellcor N-100 pulse oximeter. Co-oximeter and pulse oximeter SaO<sub>2</sub> values were compared by linear regression analysis.

# RESULTS:

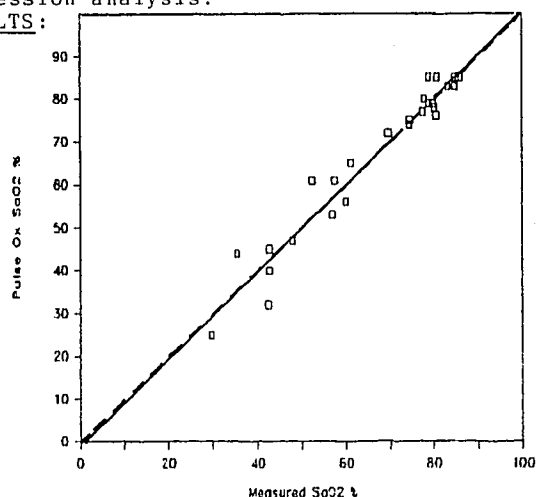

Twenty-six paired measurements were made of pulse oximetry and co-oximetry SaO<sub>2</sub> of values less than or equal to 85%. Linear regression analysis of the paired arterial blood and pulse oximetry SaO<sub>2</sub> values revealed a correlation  $Y = 1.01x - 0.71$ ,  $r = 0.97$ . The standard error of the esti-

mate (SEE) = 4.1,  $N = 26$ . The regression is demonstrated by the solid line and the dashed line is the line of identity in the figure above.

The question has been raised as to whether the regression analysis of such pooled patient data is valid.(4) Individual linear regression analysis was performed in two of our patients with  $N > 4$ . The regression equations were:  $Y = 0.823x + 14.9$ ,  $r = 1.0$ ,  $SEE = 3.2$ ,  $N = 7$  and  $Y = 1.06x - 5.7$ ,  $r = 1.0$ ,  $SEE = 1.2$ ,  $N = 6$ . These are illustrated in the following figure:

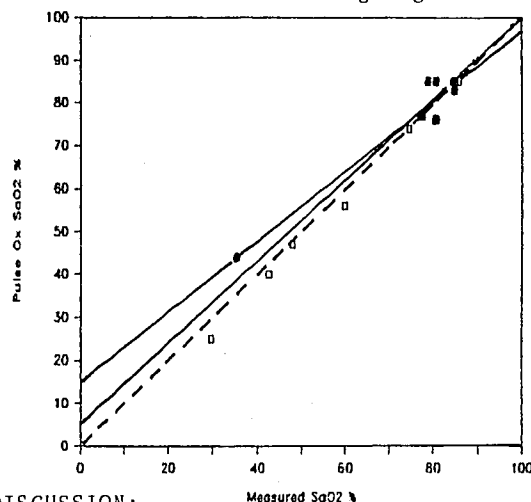

# DISCUSSION:

These results demonstrate a good correlation between pulse oximeter and arterial blood co-oximeter SaO<sub>2</sub> for values less than or equal to 85%. Pulse oximetry allows accurate continuous assessment of the patient's arterial oxygenation by means of a rapid noninvasive method of measurement.

# REFERENCES:

1. Lynn AM, Bosenberg A: Pulse oximetry during cardiac catheterization in children with congenital heart disease. *J Clin Monit* 1(3):156-160, 1985.
2. Fanconi S, Doherty P, et al: Pulse oximetry in pediatric intensive care: comparison with measured saturations and transcutaneous oxygen tension. *J Pediatr* 107(3):362-366, 1985.
3. Yelderman M, New W Jr: Evaluation of pulse oximetry. *Anesthesiology* 59(4):349-352, 1983.
4. Lichtor JL: Regression lines using multiple measurements from multiple patients. *Anes Anal* 66(4):367-68, 1987.
